# Supplementary material for: Effects of Sn on the catalytic performance for one step syngas to DME in slurry reactor
Source: Royal Society of Chemistry journal article supplement (doi:10.1039/d0nj05195k), 2020-12-18
Supplement: d0nj05195k1.pdf [file d0nj05195k1.pdf]

## Electronic Supplementary Information

### Effects of Sn on the catalytic performance for one step syngas to DME in Slurry Reactor

Lin Zhang,<sup>a,c</sup> Zhongkai Bian,<sup>a</sup> Kai Sun,<sup>b\*</sup> Wei Huang<sup>a\*</sup>

<sup>a</sup> Key Laboratory of Coal Science and Technology of Ministry of Education and Shanxi province, Taiyuan University of Technology, Taiyuan 030024, China.

<sup>b</sup> School of Chemical and Biological Engineering, Taiyuan University of Science and Technology, Taiyuan 030024, China.

<sup>c</sup> State Key Laboratory of Green Chemical Engineering and Industrial Catalysis, SINOPEC Shanghai Research Institute of Petrochemical Technology, Shanghai 201208, China

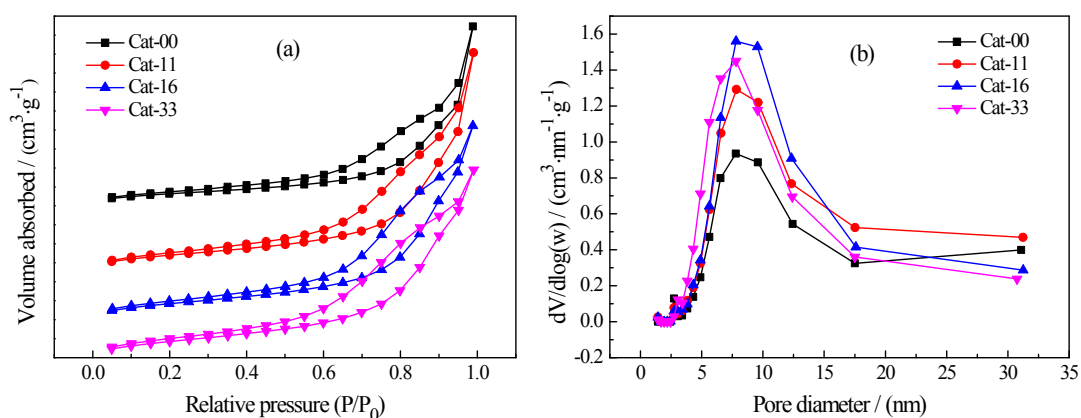

Fig.S1.  $N_2$ -adsorption-desorption isotherms(a) and pore size distribution curves(b) of parent and Sn-modified catalysts

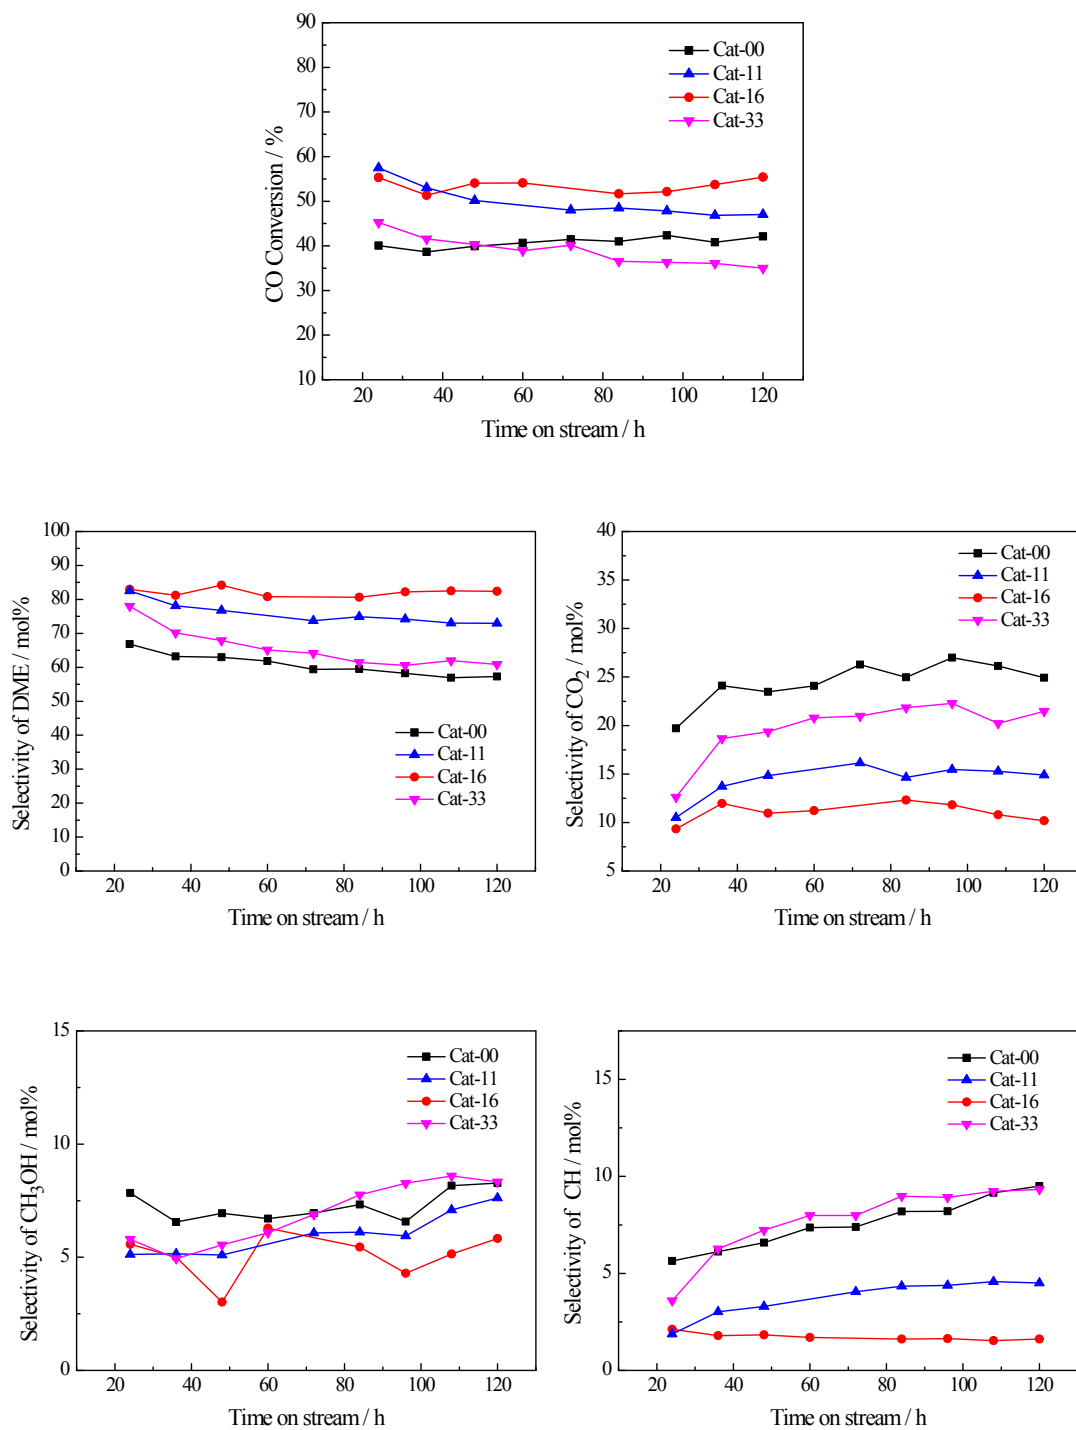

Fig.S2. The catalytic activity and product distribution (mol%) of parent and Sn-modified catalysts

Reaction condition: T = 280 °C, P = 4.0 MPa, H<sub>2</sub>/CO = 1:1

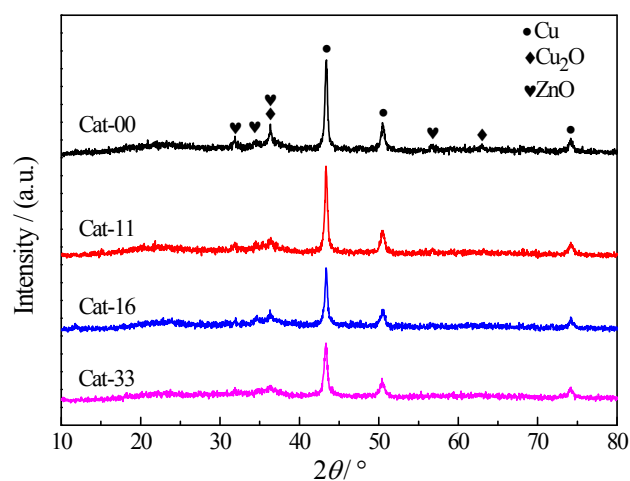

Fig.S3 XRD patterns of parent and Sn-modified catalysts after reaction

Table S1 Results of N<sub>2</sub> adsorption-desorption, XRD and XPS over parent and Sn-modified catalysts after reaction

| Catalyst | N <sub>2</sub> adsorption-desorption |                                         |                                  | Average grain size (nm) <sup>b</sup> | Surface Al/Sn <sup>c</sup> | Surface Cu/Zn <sup>c</sup> | Surface (Cu+Zn)/Al <sup>c</sup> |
|----------|--------------------------------------|-----------------------------------------|----------------------------------|--------------------------------------|----------------------------|----------------------------|---------------------------------|
|          | BET surface area (m <sup>2</sup> /g) | Average pore diameter (nm) <sup>a</sup> | Pore volume (cm <sup>3</sup> /g) |                                      |                            |                            |                                 |
| Cat-00   | 179.5                                | 0.77                                    | 18.4                             | 22.5                                 | ---                        | 0.21                       | 0.47                            |
| Cat-11   | 209.7                                | 0.93                                    | 17.8                             | 22.8                                 | 218.86                     | 0.21                       | 0.44                            |
| Cat-16   | 188.6                                | 0.88                                    | 18.7                             | 23.2                                 | 131.80                     | 0.37                       | 0.28                            |
| Cat-33   | 218.6                                | 0.79                                    | 14.5                             | 19.3                                 | 33.11                      | 0.17                       | 0.43                            |

<sup>a</sup> Average pore diameter was calculated by desorption data.

<sup>b</sup> Average grain size of Cu was calculated by Scherrer Formula ( $2\theta = 43.4^\circ$ )

<sup>c</sup> Surface element was obtained by XPS

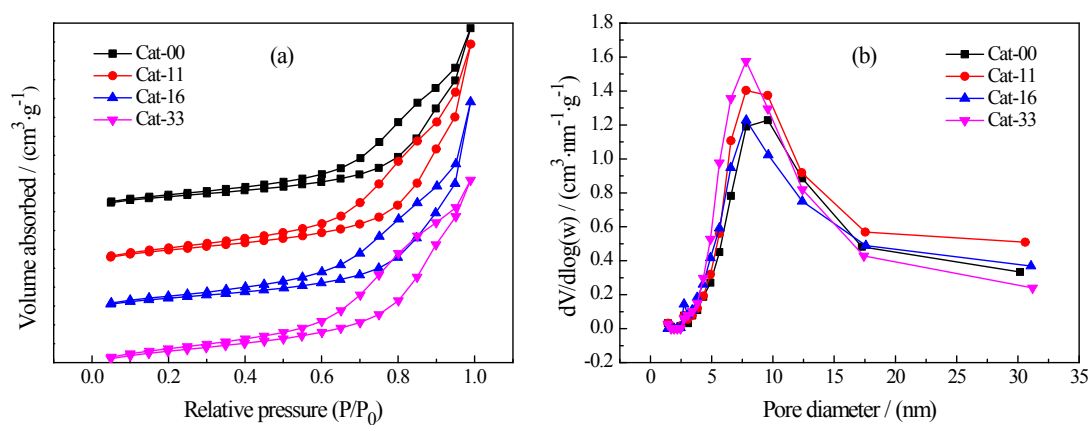

Fig.S4. N<sub>2</sub>-adsorption-desorption isotherms and pore size distribution curves of parent and Sn-modified catalysts after reaction

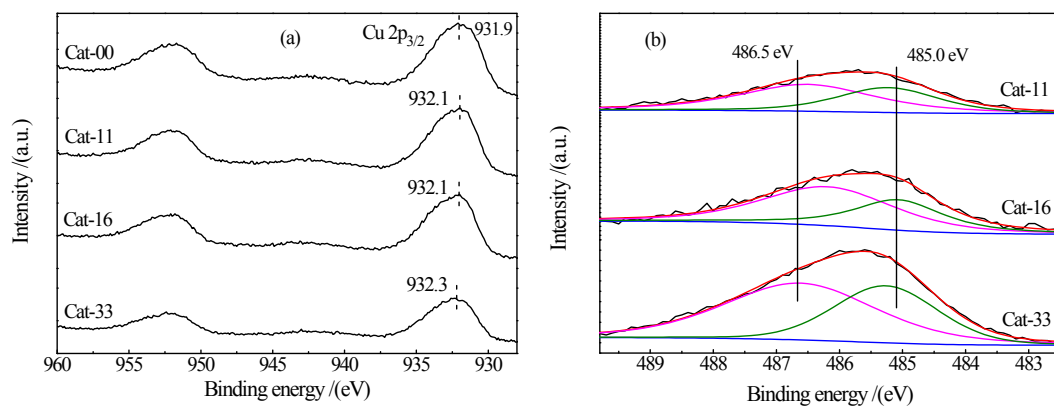

Fig.S5. XPS spectra of parent and Sn-modified catalysts after reaction (a)Cu 2p<sub>3/2</sub> region (b) Sn 3d<sub>5/2</sub> region
